# Supplementary material for: Detection of SARS-CoV-2 Nucleocapsid, Spike, and Neutralizing Antibodies in Vaccinated Japanese
Source: MDPI journal article supplement (doi:10.3390/v14050965), 2022-05-05
Supplement: s1 [file s1]

Supplementary Table S1. SARS-CoV-2 Abs of COVID-19 patients and healthy subjects with a shorter interval between last vaccination and serum collection.

|                                   | COVID-19 patients | Healthy subjects 90 days after vaccination |
|-----------------------------------|-------------------|--------------------------------------------|
| Number                            | 46                | 42                                         |
| Roche S, U/ml (SD)                | 129.9 (287.7)     | 1269.1 (1065.9)                            |
| Roche S positive, n (%)           | 37 (80.4)         | 42 (100.0)                                 |
| MBL Neu, inhibition rate (%) (SD) | 22.2 (21.1)       | 8.4 (8.2)                                  |
| MBL Neu positive, n (%)           | 28 (60.9)         | 13 (31.0)                                  |

Number or average values of each group are shown. Standard deviations or percentages are shown in parentheses. COVID-19: coronavirus disease 2019, SARS-CoV-2: severe acute respiratory syndrome coronavirus 2, Roche S: Roche Elecsys anti-SARS-CoV-2 S, MBL Neu: MBL Anti-SARS-CoV-2 neutralization Ab.

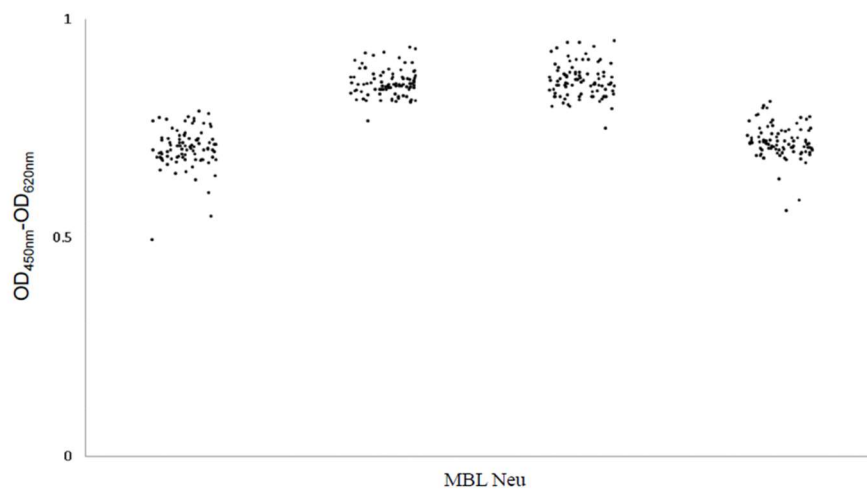

Supplementary Figure S1. The OD values in the detection of anti-SARS-CoV-2 neutralizing Abs. OD values of four experiments in the detection of anti-SARS-CoV-2 neutralizing Abs using MBL Neu. SARS-CoV-2: severe acute respiratory syndrome coronavirus 2, MBL Neu: MBL Anti-SARS-CoV-2 neutralization Ab, OD: optical density.

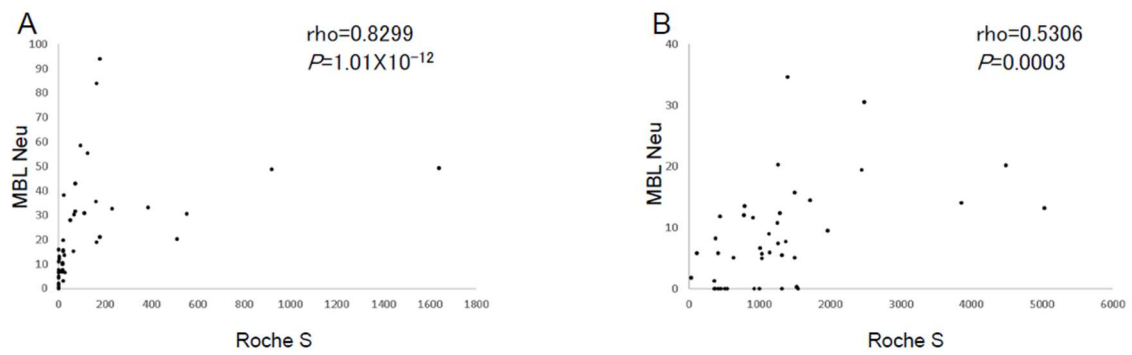

**Supplementary Figure S2. The correlation of anti-SARS-CoV-2 Abs.** Spearman correlation between Roche S and MBL Neu for COVID-19 patients (A) and healthy subjects with shorter intervals between last vaccination and serum collection (B). SARS-CoV-2: severe acute respiratory syndrome coronavirus 2, Roche S: Roche Elecsys anti-SARS-CoV-2 S, MBL Neu: MBL Anti-SARS-CoV-2 neutralization Ab.
